# Supplementary material for: Risk factors for the critical illness in SARS-CoV-2 infection: a multicenter retrospective cohort study
Source: Springer Nature journal article supplement (doi:10.1186/s12931-020-01492-z), 2020-10-21
Supplement: MOESM1 [file 18508480]

Supplementary Table S1. Reference value of variables and their potential confounders adjusted in multivariable logistic regression

|                                                                                | Reference value                             | Confounders adjusted in multivariable logistic regression |
|--------------------------------------------------------------------------------|---------------------------------------------|-----------------------------------------------------------|
| <b>Demographics and clinical characteristics</b>                               |                                             |                                                           |
| Age, years                                                                     | <30; 30-39; 39-49; 49-59; 39-69; 69-79; >79 | -                                                         |
| Female sex (vs male)                                                           | -                                           | -                                                         |
| Dyspnea (vs not dyspnea)                                                       | -                                           | Age, Sex, all comorbidities                               |
| Respiratory rate >24 breaths per min (vs respiratory rate ≤24 breaths per min) | -                                           | Age, Sex, all comorbidities, Dyspnea                      |
| <b>Comorbidity present (vs not present)</b>                                    |                                             |                                                           |
| Hypertension                                                                   | -                                           | Age, Sex                                                  |
| Diabetes                                                                       | -                                           | Age, Sex                                                  |
| Digestive tract disease                                                        | -                                           | Age, Sex                                                  |
| Cardiovascular disease                                                         | -                                           | Age, Sex                                                  |
| Cerebrovascular disease                                                        | -                                           | Age, Sex                                                  |
| Carcinoma                                                                      | -                                           | Age, Sex                                                  |
| Liver disease                                                                  | -                                           | Age, Sex                                                  |
| Chronic obstructive lung disease                                               | -                                           | Age, Sex                                                  |
| SOFA score                                                                     | -                                           | Age, Sex                                                  |
| <b>Laboratory findings</b>                                                     |                                             |                                                           |
| White blood cell count (X10 <sup>9</sup> /L)                                   | 3.5-9.5                                     | Age, Sex, all comorbidities                               |
| Lymphocyte count (X10 <sup>9</sup> /L)                                         | 1.1-3.2                                     | Age, Sex, all comorbidities                               |
| Neutrophil count (x10 <sup>9</sup> /L)                                         | 1.8-6.3                                     | Age, Sex, all comorbidities                               |
| Monocyte count (x10 <sup>9</sup> /L)                                           | 0.1-0.6                                     | Age, Sex, all comorbidities                               |
| Platelet count (x10 <sup>9</sup> /L)                                           | 125-350                                     | Age, Sex, all comorbidities                               |
| APTT (s)                                                                       | 21-37                                       | Age, Sex, all comorbidities                               |
| FIB (g/L)                                                                      | 2-4                                         | Age, Sex, all comorbidities                               |
| D-dimer (µg/mL)                                                                | 0-0.55                                      | Age, Sex, all comorbidities                               |
| ESR (mm/1h)                                                                    | 0-30                                        | Age, Sex, all comorbidities                               |
| PCT (ng/mL)                                                                    | 0-0.05                                      | Age, Sex, all comorbidities                               |
| CRP (mg/L)                                                                     | 0-10                                        | Age, Sex, all comorbidities                               |
| NLR                                                                            | 0.78-3.53                                   | Age, Sex, all comorbidities                               |
| LDH (U/L)                                                                      | 91-230                                      | Age, Sex, all comorbidities                               |
| CK (U/L)                                                                       | <171                                        | Age, Sex, all comorbidities                               |
| Creatinine (µmol/L)                                                            | 44-112                                      | Age, Sex, all comorbidities                               |
| BUN(mmol/L)                                                                    | 2.5-7.1                                     | Age, Sex, all comorbidities                               |
| AST (U/L)                                                                      | 0-40                                        | Age, Sex, all comorbidities                               |

|                            |      |                             |
|----------------------------|------|-----------------------------|
| ALT (U/L)                  | 0-50 | Age, Sex, all comorbidities |
| TBIL ( $\mu\text{mol/L}$ ) | 3-21 | Age, Sex, all comorbidities |

---

NLR=neutrophil-to-lymphocyte ratio. FIB=fibrinogen. ESR=Erythrocyte sedimentation rate.

PCT=Procalcitonin. CRP=C-reactive protein. LDH=Lactate dehydrogenase. CK=Creatine kinase.

BUN=blood urea nitrogen. AST=aspartate transaminase. ALT=alanine aminotransferase. TBIL=Total bilirubin.
