# Supplementary material for: Risk factors for the critical illness in SARS-CoV-2 infection: a multicenter retrospective cohort study
Source: Springer Nature journal article supplement (doi:10.1186/s12931-020-01492-z), 2020-10-21
Supplement: MOESM3 [file 18508480]

Supplementary table S3. Laboratory findings of all critically ill patients on admission and before discharge

|                                               | Reference values | On admission           | Before discharge       | p value      |
|-----------------------------------------------|------------------|------------------------|------------------------|--------------|
| <b>Laboratory findings</b>                    |                  |                        |                        |              |
| White blood cell count (X 10 <sup>9</sup> /L) | 3.50-9.50        | 6.45 (4.53-10.91)      | 7.89 (4.65-11.49)      | 0.764        |
| Lymphocyte count (X 10 <sup>9</sup> /L)       | 1.10-3.20        | 0.79 (0.58-1.07)       | 1.00 (0.59-1.32)       | 0.117        |
| Neutrophil count (X 10 <sup>9</sup> /L)       | 1.80-6.30        | 4.87 (2.86-8.37)       | 4.91 (3.22-8.04)       | 0.557        |
| Monocyte count (X 10 <sup>9</sup> /L)         | 0.10-0.60        | 0.36 (0.24-0.54)       | 0.41 (0.28-0.58)       | 0.633        |
| Platelet count (X 10 <sup>9</sup> /L)         | 125.00-350.00    | 194.00 (148.00-274.50) | 212.50 (157.00-296.75) | 0.150        |
| NLR                                           | 0.78-3.53        | 6.51 (2.54-14.12)      | 5.07 (2.27-10.97)      | 0.310        |
| APTT (s)                                      | 21.00-37.00      | 34.20 (28.61-36.39)    | 34.40 (25.92-38.08)    | 0.767        |
| FIB (g/L)                                     | 2.00-4.00        | 3.32 (2.68-4.10)       | 3.68 (2.64-4.56)       | 0.122        |
| D-dimer (µg/mL)                               | 0.00-0.55        | 0.40 (0.28-0.61)       | 0.56 (0.35-1.48)       | 0.577        |
| ESR (mm/1h)                                   | 0.00-30.00       | 31.00 (23.75-45.25)    | 43.00 (26.00-52.00)    | 0.083        |
| PCT (ng/mL)                                   | 0.00-0.50        | 0.24 (0.10-0.37)       | 0.23 (0.10-0.37)       | 0.930        |
| CRP(mg/L)                                     | 0.00-10.00       | 24.70 (6.89-100.19)    | 28.67 (6.29-92.31)     | 0.350        |
| LDH (U/L)                                     | 91.00-230.00     | 226.00 (183.00-323.10) | 214.00 (168.50-321.50) | 0.892        |
| CK (U/L)                                      | 25.00-200.00     | 150.00 (47.85-186.50)  | 65.6 (29.80-181.00)    | 0.248        |
| Creatinine (µmol/L)                           | 44.00-112.00     | 74.19 (62.05-86.00)    | 69.70 (57.83-91.25)    | 0.397        |
| BUN (mmol/L)                                  | 2.50-7.10        | 5.41 (4.16-6.90)       | 6.41 (4.70-7.88)       | 0.243        |
| AST (U/L)                                     | 0.00-40.00       | 37.00 (25.70-56.00)    | 45.00 (29.18-64.75)    | <b>0.038</b> |
| ALT (U/L)                                     | 0.00-50.00       | 36.45 (22.48-56.03)    | 46.00 (33.78-80.25)    | <b>0.008</b> |
| TBIL (µmol/L)                                 | 3.00-21.00       | 17.20 (8.65-23.53)     | 19.40 (12.90-23.50)    | 0.243        |

Data are median (IQR). p values are from Wilcoxon test. NLR=neutrophil-to-lymphocyte ratio. APTT=activated partial thromboplastin time. FIB=fibrinogen. ESR=Erythrocyte sedimentation rate. PCT=Procalcitonin. CRP=C-reactive protein. LDH=Lactate dehydrogenase. CK=Creatine kinase. BUN= blood urea nitrogen. AST=aspartate transaminase. ALT=alanine aminotransferase. TBIL=Total bilirubin.
