# Supplementary material for: Risk factors for the critical illness in SARS-CoV-2 infection: a multicenter retrospective cohort study
Source: Springer Nature journal article supplement (doi:10.1186/s12931-020-01492-z), 2020-10-21
Supplement: MOESM4 [file 18508480]

Supplementary Table S4, Laboratory findings of critically ill patients on admission, different hospitals

|                                               | Reference values | All critically ill (n=52) | Critically ill, Dongguan People's Hospital (n=13) | Critically ill, Jingzhou Hospital of Traditional Chinese Medicine (n=23) | Critically ill, Jingzhou Central Hospital (n=15) | p value      |
|-----------------------------------------------|------------------|---------------------------|---------------------------------------------------|--------------------------------------------------------------------------|--------------------------------------------------|--------------|
| <b>Laboratory findings</b>                    |                  |                           |                                                   |                                                                          |                                                  |              |
| White blood cell count (X 10 <sup>9</sup> /L) | 3.50-9.50        | 6.45 (4.53-10.91)         | 5.69 (4.84-7.17)                                  | 5.46 (3.80-7.53)                                                         | 11.40 (8.82-13.69)                               | <b>0.002</b> |
| Lymphocyte count (X 10 <sup>9</sup> /L)       | 1.10-3.20        | 0.79 (0.58-1.07)          | 0.75 (0.40-1.09)                                  | 0.78 (0.57-1.07)                                                         | 0.83 (0.65-1.10)                                 | 0.771        |
| Neutrophil count (X 10 <sup>9</sup> /L)       | 1.80-6.30        | 4.87 (2.86-8.37)          | 4.37 (3.33-6.43)                                  | 3.55 (1.53-5.74)                                                         | 8.42 (5.91-12.80)                                | <b>0.002</b> |
| Monocyte count (X 10 <sup>9</sup> /L)         | 0.10-0.60        | 0.36 (0.24-0.54)          | 0.36 (0.32-0.42)                                  | 0.35 (0.17-0.54)                                                         | 0.34 (0.24-0.82)                                 | 0.591        |
| Platelet count (X 10 <sup>9</sup> /L)         | 125.00-350.00    | 194.00 (148.00-274.50)    | 162.00 (148.00-251.00)                            | 178.00 (124.00-254.00)                                                   | 231.00 (201.00-323.00)                           | <b>0.024</b> |
| NLR                                           | 0.78-3.53        | 6.51 (2.54-14.12)         | 6.43 (2.74-14.54)                                 | 4.30 (1.90-9.71)                                                         | 11.71 (4.65-17.54)                               | 0.066        |
| APTT (s)                                      | 21.00-37.00      | 34.20 (28.61-36.39)       | 35.70 (34.20-40.55)                               | 30.41 (24.65-35.70)                                                      | 33.54 (30.20-36.40)                              | 0.062        |
| FIB (g/L)                                     | 2.00-4.00        | 3.70 (3.11-4.86)          | 4.62 (3.33-5.51)                                  | 3.57 (3.25-4.53)                                                         | 3.76 (2.67-5.11)                                 | 0.287        |
| D-dimer (μg/mL)                               | 0.00-0.55        | 0.50 (0.31-1.30)          | 1.17 (0.43-1.92)                                  | 0.38 (0.28-1.16)                                                         | 0.54 (0.35-1.02)                                 | 0.201        |
| ESR (mm/1h)                                   | 0.00-30.00       | 31.00 (23.75-45.25)       | 15.00 (5.50-58.75)                                | 30.00 (25.00-65.00)                                                      | 37.00 (24.00-44.00)                              | 0.236        |
| PCT (ng/mL)                                   | 0.00-0.50        | 0.24 (0.10-0.37)          | 0.11 (0.10-0.17)                                  | 0.34 (0.13-0.40)                                                         | 0.30 (0.23-0.42)                                 | <b>0.017</b> |
| CRP(mg/L)                                     | 0.00-10.00       | 24.70 (6.89-100.19)       | 17.86 (5.00-65.02)                                | 34.06 (11.21-113.63)                                                     | 39.67 (6.89-130.00)                              | 0.268        |
| LDH (U/L)                                     | 91.00-230.00     | 226.00 (183.00-323.10)    | 202.55 (178.63-288.96)                            | 226.00 (184.50-483.50)                                                   | 250.50 (165.00-342.00)                           | 0.584        |
| CK (U/L)                                      | 25.00-200.00     | 150.00 (47.85-186.50)     | 47.85 (35.70-70.08)                               | 175.50 (152.00-380.25)                                                   | 108.75 (26.43-350.75)                            | <b>0.001</b> |
| Creatinine (μmol/L)                           | 44.00-112.00     | 74.19 (62.05-86.00)       | 64.30 (46.40-71.60)                               | 84.60 (68.90-94.55)                                                      | 63.20 (54.30-79.00)                              | <b>0.001</b> |
| BUN (mmol/L)                                  | 2.50-7.10        | 5.41 (4.16-6.90)          | 4.90 (3.80-6.00)                                  | 6.01 (5.01-8.98)                                                         | 5.32 (4.16-6.71)                                 | 0.089        |
| AST (U/L)                                     | 0.00-40.00       | 37.00 (25.70-56.00)       | 24.70 (18.70-29.20)                               | 41.00 (31.00-65.00)                                                      | 45.00 (35.00-76.00)                              | <b>0.001</b> |
| ALT (U/L)                                     | 0.00-50.00       | 36.45 (22.48-56.03)       | 22.40 (17.65-53.65)                               | 37.00 (26.00-49.00)                                                      | 51.00 (32.10-89.00)                              | 0.057        |

---

|                            |            |                    |                    |                    |                     |              |
|----------------------------|------------|--------------------|--------------------|--------------------|---------------------|--------------|
| TBIL ( $\mu\text{mol/L}$ ) | 3.00-21.00 | 17.20 (8.65-23.53) | 18.10 (9.25-21.10) | 15.30 (7.80-17.80) | 28.90 (20.10-32.80) | <b>0.001</b> |
|----------------------------|------------|--------------------|--------------------|--------------------|---------------------|--------------|

---

Data are median (IQR). p values are from Kruskal-Wallis test. NLR=neutrophil-to-lymphocyte ratio. APTT=activated partial thromboplastin time. FIB=fibrinogen. ESR=Erythrocyte sedimentation rate. PCT=Procalcitonin. CRP=C-reactive protein. LDH=Lactate dehydrogenase. CK=Creatine kinase. BUN= blood urea nitrogen. AST=aspartate transaminase. ALT=alanine aminotransferase. TBIL=Total bilirubin.
