# Supplementary material for: Risk factors for the critical illness in SARS-CoV-2 infection: a multicenter retrospective cohort study
Source: Springer Nature journal article supplement (doi:10.1186/s12931-020-01492-z), 2020-10-21
Supplement: MOESM5 [file 18508480]

Supplementary Table S5, Imaging features on admission, different hospitals

|                                  | Jingzhou Hospital of Traditional Chinese Medicine (n=103) |                       |         | Jingzhou Central Hospital (n=21) |                       |         | Jieyang People's Hospital (n=8) |                      |         |
|----------------------------------|-----------------------------------------------------------|-----------------------|---------|----------------------------------|-----------------------|---------|---------------------------------|----------------------|---------|
|                                  | Non-critically ill (n=80)                                 | Critically ill (n=23) | p value | Non-critically ill (n=6)         | Critically ill (n=15) | p value | Non-critically ill (n=7)        | Critically ill (n=1) | p value |
| <b>Imaging features</b>          |                                                           |                       |         |                                  |                       |         |                                 |                      |         |
| Ground-glass opacity             | 11 (13.8)                                                 | 7 (30.4)              | 0.063   | 1 (16.7)                         | 2 (13.3)              | 0.844   | 1 (14.3)                        | 0 (0)                | 0.686   |
| Unilateral pulmonary abnormality | 16 (20.0)                                                 | 1 (4.3)               | 0.075   | 1 (16.7)                         | 0 (0)                 | 0.105   | 3 (42.9)                        | 0 (0)                | 0.408   |
| Bilateral pulmonary abnormality  | 60 (75.0)                                                 | 21 (91.3)             | 0.093   | 1 (16.7)                         | 4 (26.7)              | 0.627   | 4 (57.1)                        | 1 (100.0)            | 0.408   |

Data are n (%). p values are from  $\chi^2$  test.
